# Supplementary material
Source: Research Square preprint supplement (doi:10.21203/rs.3.rs-8937137/v1)
Supplement: Supplementary file 1 [file 6b6a6acd8cedd7916475822d.docx]

# Supplementary Table 1. Endocannabinoid-Related Gene Sets Used for Gene-Set Enrichment Analysis

Table S 1.1. Summary of Endocannabinoid-Related Gene Sets

| **Gene Set Name** | **Source Database** | **Identifier** | **No. of Genes** | **Reference** |
| --- | --- | --- | --- | --- |
| GOBP_CANNABINOID_SIGNALING_PATHWAY | Gene Ontology Biological Process (MSigDB C5) | GO:0038171 | 9 | The Gene Ontology Consortium (2025) |
| WP_CANNABINOID_RECEPTOR_SIGNALING | WikiPathways (MSigDB C2) | WP3869 | 29 | Martens et al. (2021) |
| Retrograde Endocannabinoid Signaling | KEGG Pathway | hsa04723 | 148 | Kanehisa et al. (2025) |

Table S1.2. Gene Composition of Each Endocannabinoid-Related Gene Set

GOBP_CANNABINOID_SIGNALING_PATHWAY (GO:0038171; n = 9 genes)

| ABHD6 | ALOX15B | CAMK2A | CNR1 | CNR2 |
| --- | --- | --- | --- | --- |
| FABP1 | GPR55 | MGLL | SCP2 |  |

WP_CANNABINOID_RECEPTOR_SIGNALING (WP3869; n = 29 genes)

| ADCY1 | ADCY7 | ADORA2A | AHR | CNR1 |
| --- | --- | --- | --- | --- |
| CNR2 | CYP1A1 | CYP2C19 | CYP2C9 | CYP3A4 |
| DAGLA | DAGLB | FAAH | MAPK1 | MAPK3 |
| MAPK8 | MAPK9 | MAPK10 | MAPK11 | MAPK12 |
| MAPK13 | MAPK14 | NAPEPLD | PRKACA | PRKACB |
| PRKACG | PRKAR1A | PRKAR1B | PRKAR2B |  |

Retrograde Endocannabinoid Signaling (KEGG hsa04723; n = 148 genes)

| ABHD6 | ADCY1 | ADCY2 | ADCY3 | ADCY4 |
| --- | --- | --- | --- | --- |
| ADCY5 | ADCY6 | ADCY7 | ADCY8 | ADCY9 |
| CACNA1A | CACNA1B | CACNA1C | CACNA1D | CACNA1F |
| CACNA1S | CNR1 | DAGLA | DAGLB | FAAH |
| GABRA1 | GABRA2 | GABRA3 | GABRA4 | GABRA5 |
| GABRA6 | GABRB1 | GABRB2 | GABRB3 | GABRD |
| GABRE | GABRG1 | GABRG2 | GABRG3 | GABRP |
| GABRQ | GABRR1 | GABRR2 | GABRR3 | GNAI1 |
| GNAI2 | GNAI3 | GNAO1 | GNAQ | GNB1 |
| GNB2 | GNB3 | GNB4 | GNB5 | GNG2 |
| GNG3 | GNG4 | GNG5 | GNG7 | GNG8 |
| GNG10 | GNG11 | GNG12 | GNG13 | GNGT1 |
| GNGT2 | GRIA1 | GRIA2 | GRIA3 | GRIA4 |
| GRM1 | GRM5 | ITPR1 | ITPR2 | ITPR3 |
| KCNJ3 | KCNJ5 | KCNJ6 | KCNJ9 | MAPK1 |
| MAPK3 | MAPK8 | MAPK9 | MAPK10 | MAPK11 |
| MAPK12 | MAPK13 | MAPK14 | MGLL | NAPEPLD |
| ND1 | ND2 | ND3 | ND4 | ND4L |
| ND5 | ND6 | NDUFA1 | NDUFA2 | NDUFA3 |
| NDUFA4 | NDUFA4L2 | NDUFA5 | NDUFA6 | NDUFA7 |
| NDUFA8 | NDUFA9 | NDUFA10 | NDUFA11 | NDUFA12 |
| NDUFA13 | NDUFAB1 | NDUFB1 | NDUFB2 | NDUFB3 |
| NDUFB4 | NDUFB5 | NDUFB6 | NDUFB7 | NDUFB8 |
| NDUFB9 | NDUFB10 | NDUFB11 | NDUFC1 | NDUFC2 |
| NDUFC2-KCTD14 | NDUFS1 | NDUFS2 | NDUFS3 | NDUFS4 |
| NDUFS5 | NDUFS6 | NDUFS7 | NDUFS8 | NDUFV1 |
| NDUFV2 | NDUFV3 | PLCB1 | PLCB2 | PLCB3 |
| PLCB4 | PRKACA | PRKACB | PRKACG | PRKCA |
| PRKCB | PRKCG | PTGS2 | RIMS1 | SLC17A6 |
| SLC17A7 | SLC17A8 | SLC32A1 |  |  |
